# Supplementary material
Source: PubMed Central journal article supplement (PMC7706089)
Supplement: oc0c00568_si_001.pdf [file oc0c00568_si_001.pdf]

## Supporting Information:

### Structural Optimization of Polymeric Carriers to Enhance the Immunostimulatory Activity of Molecularly-Defined RIG-I Agonists

Max E. Jacobson, Kyle W. Becker, Christian R. Palmer, Lucinda E. Pastora, R. Brock Fletcher, Kathryn A. Collins, Olga Fedorova, Craig L. Duvall, Anna M. Pyle, John. T. Wilson

#### Supplementary Data:

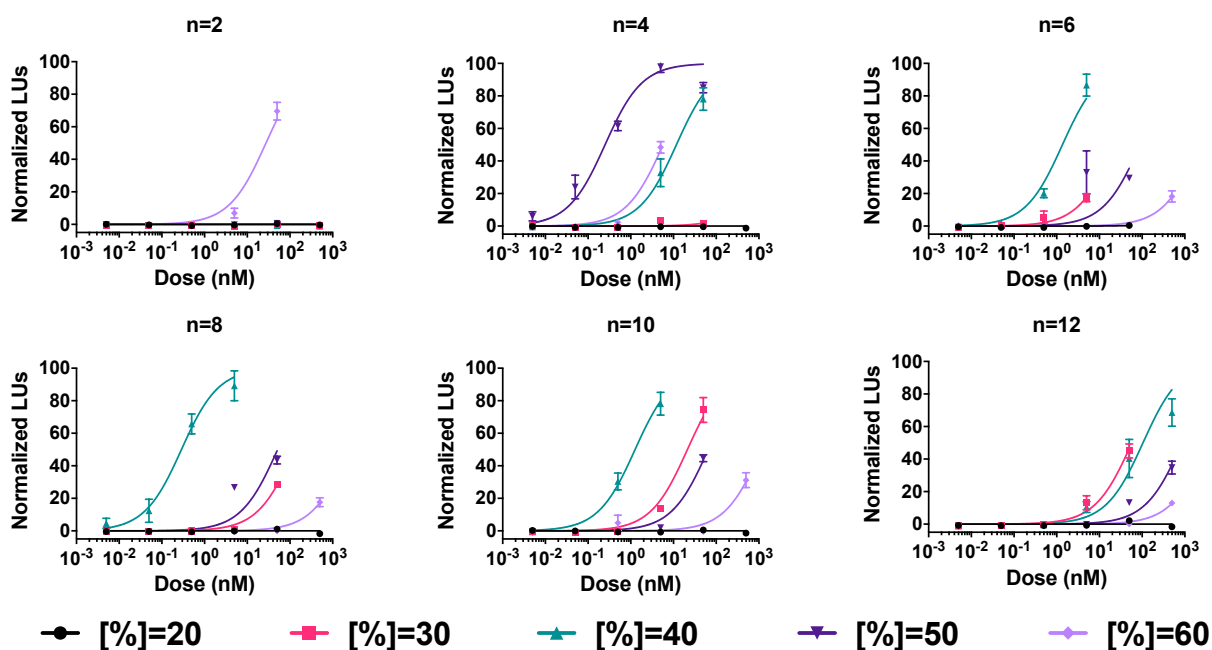

**Figure S1.** Dose response curves in A549 ISG reporter cells using PEG-*block*-(DMAEMA-*co*-A<sub>n</sub>MA[%]) polymers for delivery of 3pRNA.

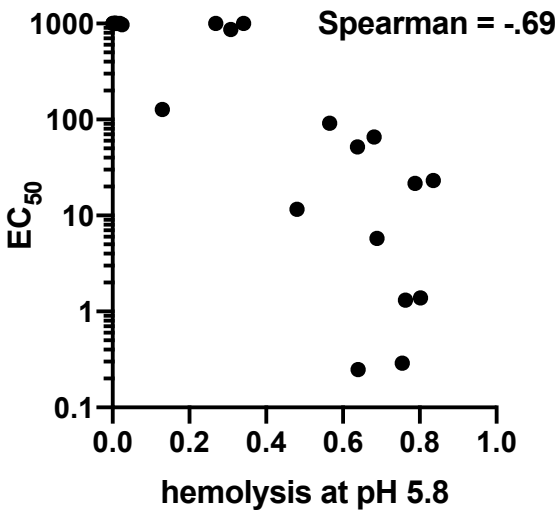

**Figure S2.** Spearman correlation between estimated EC<sub>50</sub> of 3pRNA polymer carriers in A549 ISG cells versus fraction hemolysis at pH 5.8. EC<sub>50</sub> values that could not be estimated due to lack of activity were assigned a value of 1000 nM.  $P < 0.0001$ .

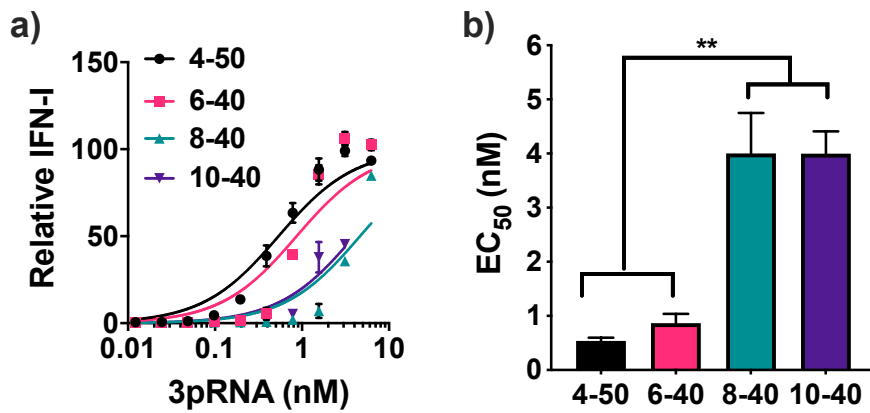

**Figure S3.** (a) Dose response curves of lead carriers for 3pRNA in A549 ISG reporter cells. (b) Summary of EC<sub>50</sub> values for indicated NP/3pRNA complexes determined from dose response curves.

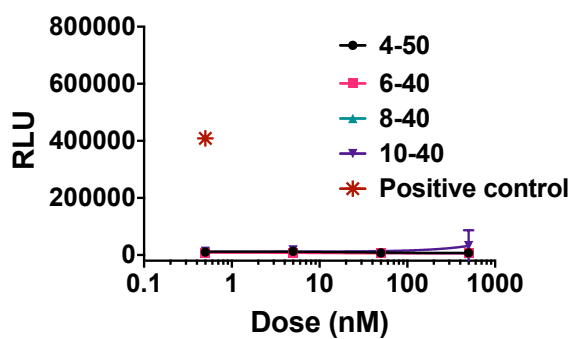

**Figure S4.** Dose response curves of lead carriers complexed with control OH-RNA in A549 ISG reporter cells. Positive control is 4-50 complexed with an analogous 3pRNA.

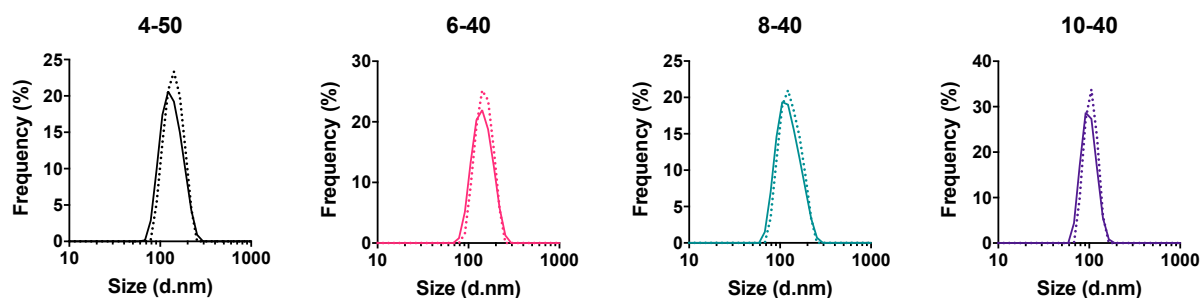

**Figure S5.** Size distribution of indicated NP/RNA complex measured by dynamic light scattering.

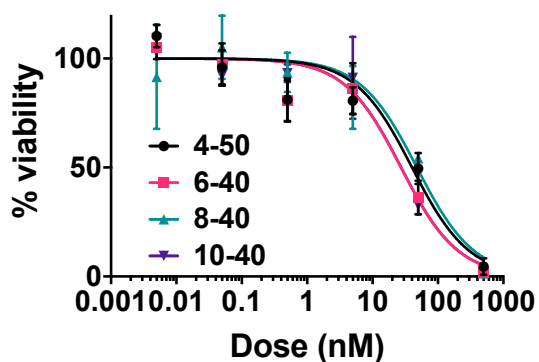

**Figure S6.** Viability of A549 cells after treatment with indicated NP/OH-RNA complexes for 24h.

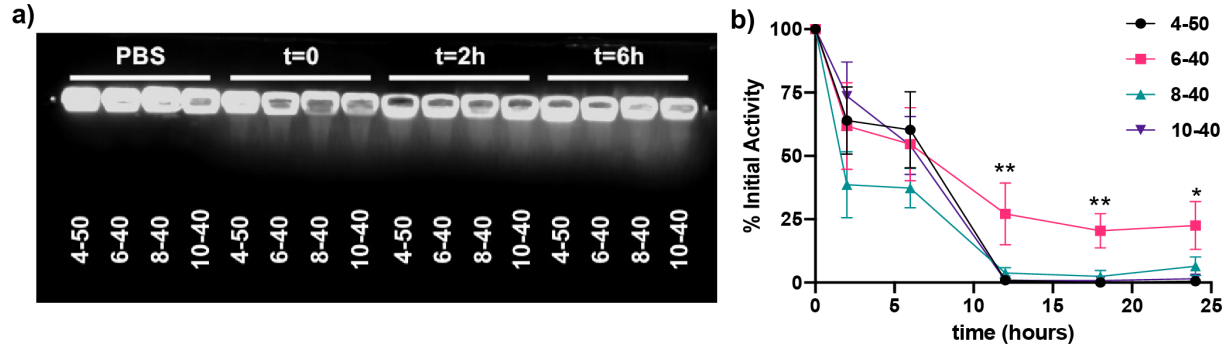

**Figure S7.** *In vitro* evaluation of NP/RNA stability. (a) Agarose gel electrophoresis of indicated NP/RNA complexes following incubation in 10% serum for 0, 2, or 6 h. (b) Evaluation of NP/3pRNA activity in A549-Dual cells as a function of incubation time in 80% serum, plotted as percentage of initial activity. Data are mean  $\pm$  SD for three independent experiments each with N=3. \* $P$ <0.05, \*\* $P$ <0.01 by one-way ANOVA for 6-40 relative to other carriers.

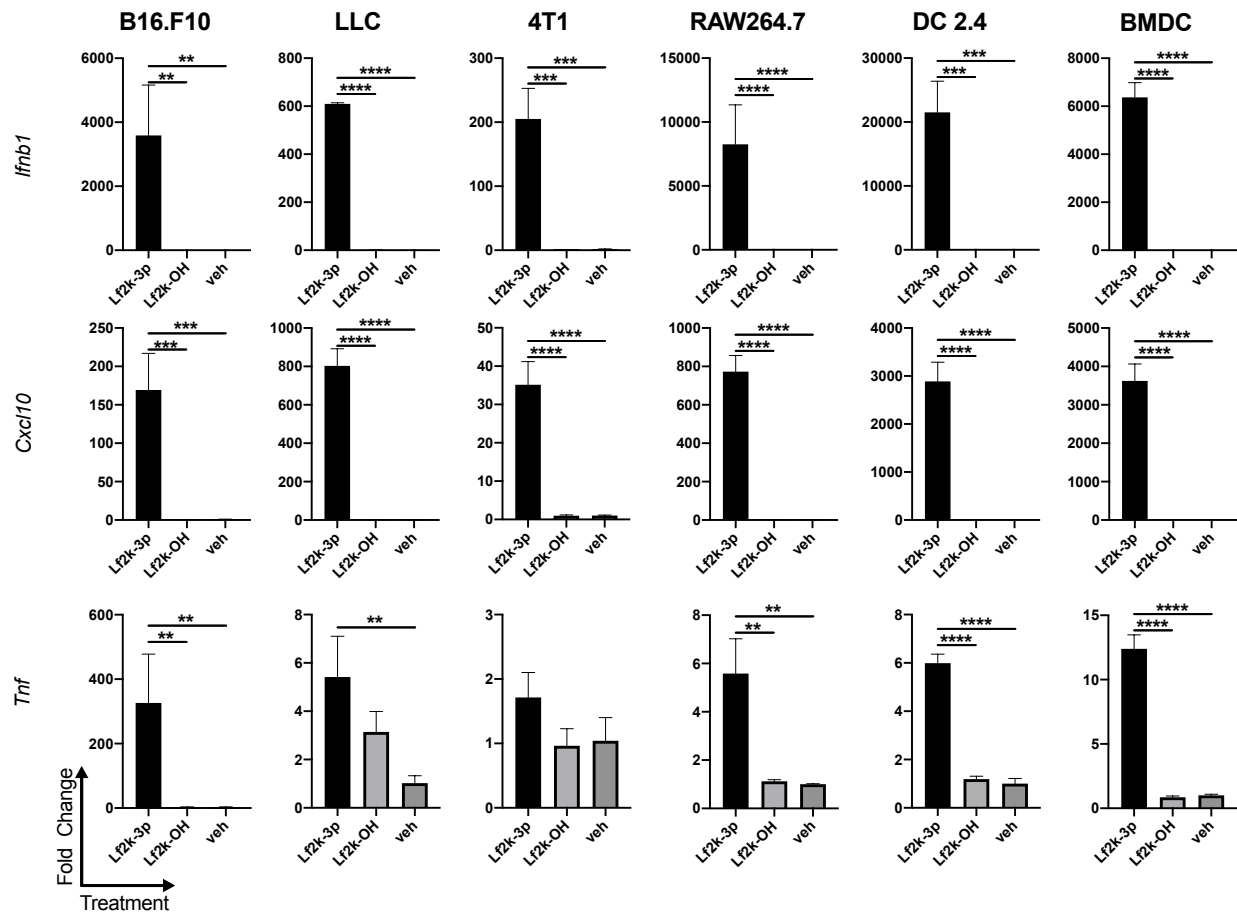

**Figure S8.** Evaluation of 3pRNA and negative control OH-RNA activity. The indicated cell type was treated with 3pRNA or OH-RNA was complexed with Lipofectamine 2000 (Lf2k) at 20 nM or vehicle (veh, PBS) for 6 h and expression levels of *Ifnb1*, *Cxcl10*, and *Tnf* quantified via qRT-PCR. All values plotted as mean  $\pm$  SD. \* $P$ <0.05, \*\* $P$ <0.01, \*\*\* $P$ <0.001, \*\*\*\* $P$ <0.0001 by one-way ANOVA with Tukey post-hoc test.

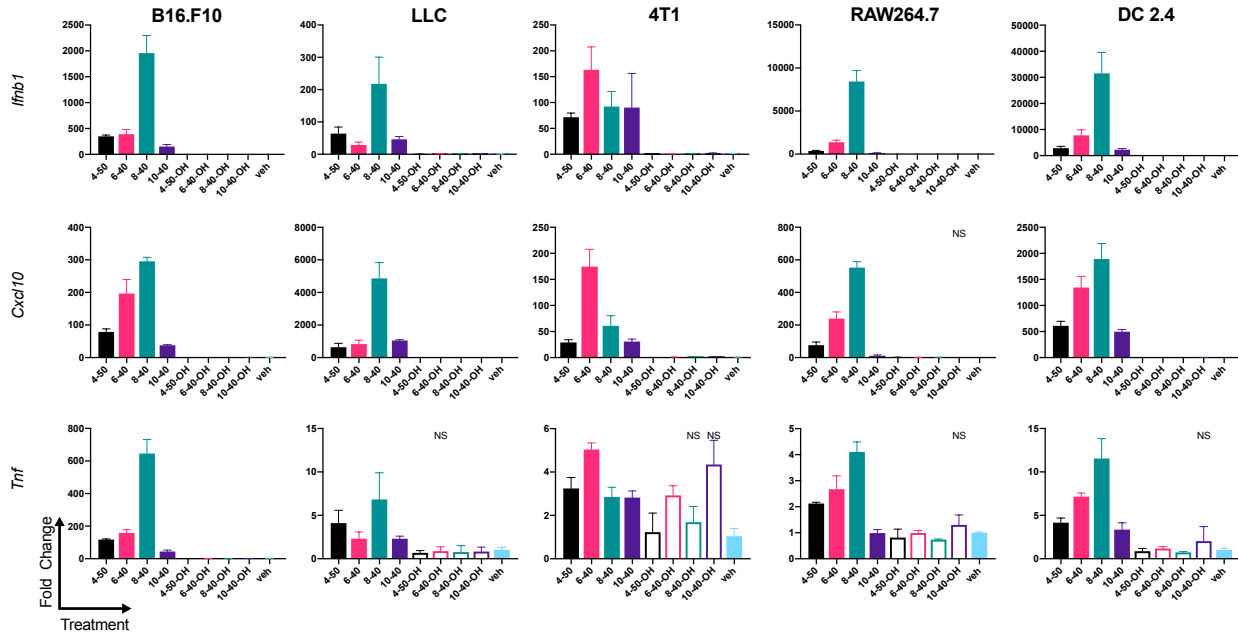

**Figure S9.** Evaluation of NP/3pRNA and NP/OH-RNA in cell lines. The indicated cell type was treated with 3pRNA or OH-RNA complexed with the indicated lead carrier (4-50, 6-40, 8-40, or 10-40) at 20 nM or vehicle (veh, PBS) for 6 h and expression levels of *Ifnb1*, *Cxcl10*, and *Tnf* were quantified via qRT-PCR. All values plotted as mean  $\pm$  SD. All instances in which NP/3pRNA is not statistically significantly increased over NP/OH-RNA ( $P > 0.05$  by Student's t-test) are marked with "NS"; otherwise, NP/3pRNA is statistically significant than NP/OH-RNA with a  $P$ -value of at least 0.05.

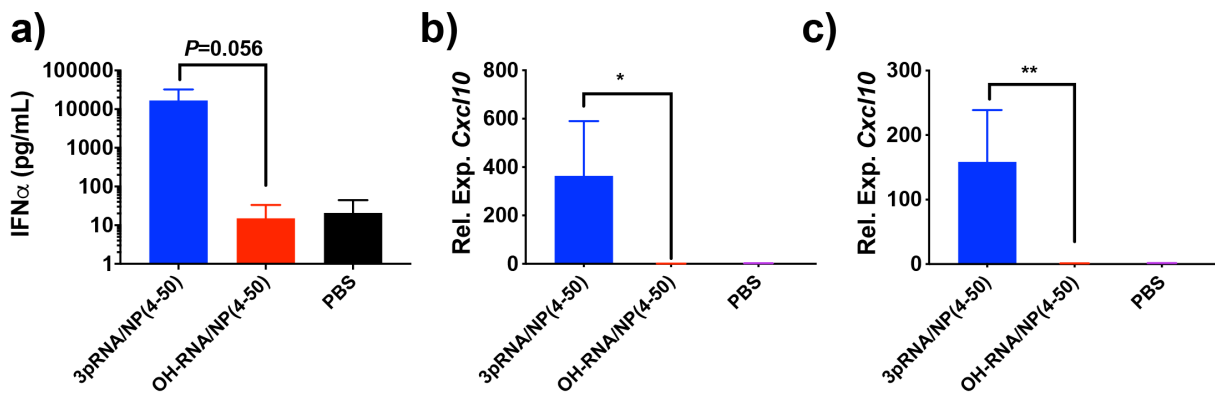

**Figure S10.** Mice were intravenously injected with 4-50 complexed with 3pRNA (1.25 mg/kg RNA), 4-50 complexed with negative control OH-RNA (1.25 mg/kg RNA), or PBS (vehicle) and blood, liver, and spleen were harvested five hours after injection. (a) Serum levels of IFN $\alpha$  measured by ELISA. Relative expression level of *Cxcl10* in the (b) liver and (c) spleen measured via qRT-PCR. All values plotted as mean  $\pm$  SD. \*\* $P < 0.05$ , \*\*\* $P < 0.001$  by one-way ANOVA with Tukey's post-hoc test; only the comparison between 3pRNA/NP(4-50) and OH-RNA/NP(4-50) is shown.

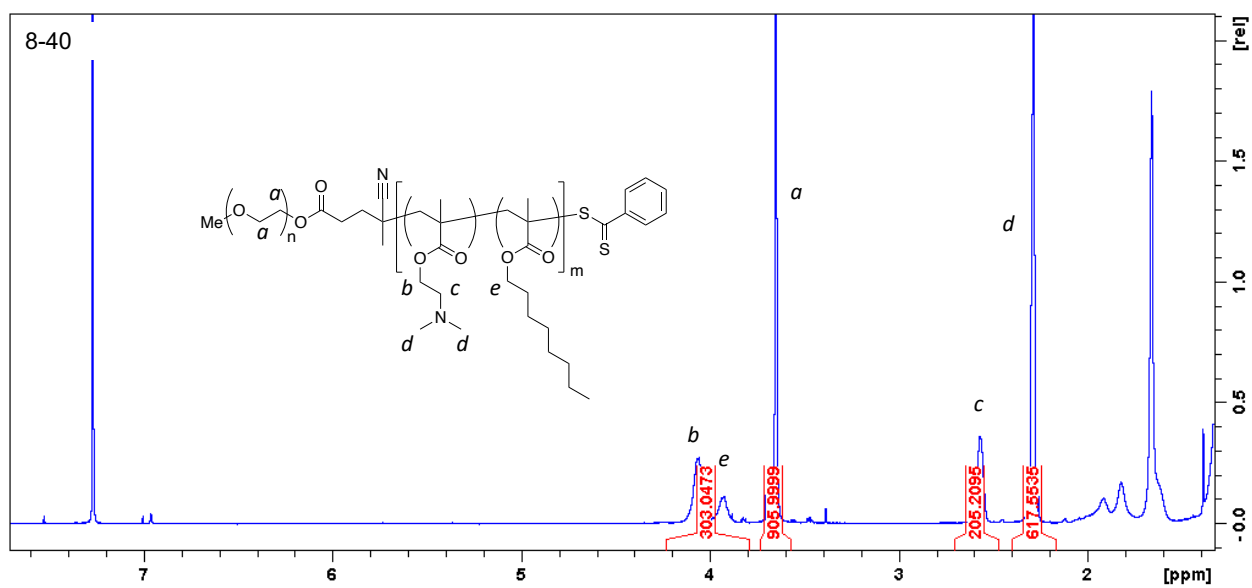

**Figure S11.** Representative  $^1\text{H}$  NMR spectrum of 8-40. All other polymers have the same characteristic spectra.

**Table S1:** Statistical analysis of hemolysis data in Figure 2c – comparison between pH values

| polymer | Adjusted P-value<br>pH comparison |             |             |
|---------|-----------------------------------|-------------|-------------|
|         | 5.8 vs. 6.6                       | 5.8 vs. 7.4 | 6.6 vs. 7.4 |
| 2 - 20  |                                   |             |             |
| 2 - 30  |                                   |             |             |
| 2 - 40  |                                   |             |             |
| 2 - 50  |                                   |             |             |
| 2 - 60  |                                   |             |             |
| 4 - 20  |                                   |             |             |
| 4 - 30  | 0.6749                            |             | 0.6373      |
| 4 - 40  | ****                              | ****        | ****        |
| 4 - 50  | ****                              | ****        | 0.0015      |
| 4 - 60  | ****                              | ****        | 0.4802      |
| 6 - 20  | 0.0897                            | 0.7307      | 0.3662      |
| 6 - 30  | ****                              | ****        | ****        |
| 6 - 40  | ****                              | ****        | 0.0372      |
| 6 - 50  | ****                              | ****        |             |
| 6 - 60  | ****                              | ****        | 0.8648      |
| 8 - 20  | ****                              |             | ****        |
| 8 - 30  |                                   | 0.0027      | 0.0020      |
| 8 - 40  | ****                              | ****        | 0.6439      |
| 8 - 50  | ****                              | ****        |             |
| 8 - 60  | ****                              | ****        |             |
| 10 - 20 | 0.0287                            | 0.774       | 0.1440      |
| 10 - 30 | ****                              | ****        | ****        |
| 10 - 40 | ****                              | ****        | 0.7546      |
| 10 - 50 | ****                              | ****        | 0.4068      |
| 10 - 60 | 0.7407                            | 0.6773      |             |
| 12 - 20 |                                   |             |             |
| 12 - 30 | 0.8941                            |             |             |
| 12 - 40 |                                   |             |             |
| 12 - 50 | ****                              | ****        |             |
| 12 - 60 |                                   |             |             |

**Table S2:** Statistical analysis of hemolysis data in Figure 2c – comparison between polymers

| polymer comparison | Adjusted P-value |        |        |
|--------------------|------------------|--------|--------|
|                    | pH 5.8           | pH 6.6 | pH 7.4 |
| 2-20 vs. 2-30      |                  |        |        |
| 2-20 vs. 2-40      |                  |        |        |
| 2-20 vs. 2-50      |                  |        |        |
| 2-20 vs. 2-60      |                  |        |        |
| 2-20 vs. 4-20      |                  |        |        |
| 2-20 vs. 4-30      |                  |        |        |
| 2-20 vs. 4-40      | ****             | ****   |        |
| 2-20 vs. 4-50      | ****             | ****   |        |
| 2-20 vs. 4-60      | ****             |        |        |
| 2-20 vs. 6-20      |                  | 0.0588 | ****   |
| 2-20 vs. 6-30      | ****             | ****   | 0.8461 |
| 2-20 vs. 6-40      | ****             | 0.0223 |        |
| 2-20 vs. 6-50      | ****             |        |        |
| 2-20 vs. 6-60      | 0.0011           |        |        |
| 2-20 vs. 8-20      |                  | ****   | 0.0008 |
| 2-20 vs. 8-30      |                  | ****   |        |
| 2-20 vs. 8-40      | ****             |        |        |
| 2-20 vs. 8-50      | ****             |        |        |
| 2-20 vs. 8-60      | 0.0469           |        |        |
| 2-20 vs. 10-20     |                  | 0.0017 | ****   |
| 2-20 vs. 10-30     | ****             | ****   |        |
| 2-20 vs. 10-40     | ****             |        |        |
| 2-20 vs. 10-50     | ****             |        |        |
| 2-20 vs. 10-60     |                  |        |        |
| 2-20 vs. 12-20     |                  |        |        |
| 2-20 vs. 12-30     |                  |        |        |
| 2-20 vs. 12-40     |                  |        |        |
| 2-20 vs. 12-50     | 0.0019           |        |        |
| 2-20 vs. 12-60     |                  |        |        |
| 2-30 vs. 2-40      |                  |        |        |
| 2-30 vs. 2-50      |                  |        |        |
| 2-30 vs. 2-60      |                  |        |        |
| 2-30 vs. 4-20      |                  |        | 0.8458 |
| 2-30 vs. 4-30      |                  |        | 0.1052 |
| 2-30 vs. 4-40      | ****             | ****   |        |
| 2-30 vs. 4-50      | ****             | ****   |        |
| 2-30 vs. 4-60      | ****             |        |        |
| 2-30 vs. 6-20      |                  | 0.1386 | ****   |
| 2-30 vs. 6-30      | ****             | ****   | 0.0438 |
| 2-30 vs. 6-40      | ****             | 0.0588 |        |
| 2-30 vs. 6-50      | ****             |        |        |
| 2-30 vs. 6-60      | 0.0011           |        |        |
| 2-30 vs. 8-20      |                  | ****   | ****   |
| 2-30 vs. 8-30      |                  | ****   |        |
| 2-30 vs. 8-40      | ****             |        |        |
| 2-30 vs. 8-50      | ****             |        |        |
| 2-30 vs. 8-60      | 0.0460           |        |        |



|                |        |        |      |
|----------------|--------|--------|------|
| 2-30 vs. 10-20 |        | 0.0055 | **** |
| 2-30 vs. 10-30 | ****   | ****   |      |
| 2-30 vs. 10-40 | ****   |        |      |
| 2-30 vs. 10-50 | ****   |        |      |
| 2-30 vs. 10-60 |        |        |      |
| 2-30 vs. 12-20 |        |        |      |
| 2-30 vs. 12-30 |        |        |      |
| 2-30 vs. 12-40 |        |        |      |
| 2-30 vs. 12-50 | 0.0019 |        |      |
| 2-30 vs. 12-60 |        |        |      |

|                |        |        |        |
|----------------|--------|--------|--------|
| 2-40 vs. 2-50  |        |        |        |
| 2-40 vs. 2-60  |        |        |        |
| 2-40 vs. 4-20  |        |        | 0.6430 |
| 2-40 vs. 4-30  |        | 0.8767 | 0.0439 |
| 2-40 vs. 4-40  | ****   | ****   |        |
| 2-40 vs. 4-50  | ****   | ****   |        |
| 2-40 vs. 4-60  | ****   |        |        |
| 2-40 vs. 6-20  |        | 0.0197 | ****   |
| 2-40 vs. 6-30  | ****   | ****   | 0.0165 |
| 2-40 vs. 6-40  | ****   | 0.0067 |        |
| 2-40 vs. 6-50  | ****   |        |        |
| 2-40 vs. 6-60  | 0.0006 |        |        |
| 2-40 vs. 8-20  |        | ****   | ****   |
| 2-40 vs. 8-30  |        | ****   |        |
| 2-40 vs. 8-40  | ****   |        |        |
| 2-40 vs. 8-50  | ****   |        |        |
| 2-40 vs. 8-60  | 0.0271 |        |        |
| 2-40 vs. 10-20 |        | 0.0004 | ****   |
| 2-40 vs. 10-30 | ****   | ****   | 0.7865 |
| 2-40 vs. 10-40 | ****   |        |        |
| 2-40 vs. 10-50 | ****   |        |        |
| 2-40 vs. 10-60 |        |        |        |
| 2-40 vs. 12-20 |        |        |        |
| 2-40 vs. 12-30 |        |        |        |
| 2-40 vs. 12-40 |        |        |        |
| 2-40 vs. 12-50 | 0.0009 |        |        |
| 2-40 vs. 12-60 |        |        |        |

|               |        |        |        |
|---------------|--------|--------|--------|
| 2-50 vs. 2-60 |        |        |        |
| 2-50 vs. 4-20 |        |        |        |
| 2-50 vs. 4-30 |        |        | 0.7179 |
| 2-50 vs. 4-40 | ****   | ****   |        |
| 2-50 vs. 4-50 | ****   | ****   |        |
| 2-50 vs. 4-60 | ****   |        |        |
| 2-50 vs. 6-20 |        | 0.0807 | ****   |
| 2-50 vs. 6-30 | ****   | ****   | 0.4869 |
| 2-50 vs. 6-40 | ****   | 0.0317 |        |
| 2-50 vs. 6-50 | ****   |        |        |
| 2-50 vs. 6-60 | 0.0005 |        |        |
| 2-50 vs. 8-20 |        | ****   | 0.0001 |
| 2-50 vs. 8-30 |        | ****   |        |
| 2-50 vs. 8-40 | ****   |        |        |
| 2-50 vs. 8-50 | ****   |        |        |

|                |        |        |      |
|----------------|--------|--------|------|
| 2-50 vs. 8-60  | 0.0235 |        |      |
| 2-50 vs. 10-20 |        | 0.0026 | **** |
| 2-50 vs. 10-30 | ****   | ****   |      |
| 2-50 vs. 10-40 | ****   |        |      |
| 2-50 vs. 10-50 | ****   |        |      |
| 2-50 vs. 10-60 |        |        |      |
| 2-50 vs. 12-20 |        |        |      |
| 2-50 vs. 12-30 |        |        |      |
| 2-50 vs. 12-40 |        |        |      |
| 2-50 vs. 12-50 | 0.0008 |        |      |
| 2-50 vs. 12-60 |        |        |      |

|                |        |        |        |
|----------------|--------|--------|--------|
| 2-60 vs. 4-20  |        |        |        |
| 2-60 vs. 4-30  |        |        | 0.2791 |
| 2-60 vs. 4-40  | ****   | ****   |        |
| 2-60 vs. 4-50  | ****   | 0.0001 |        |
| 2-60 vs. 4-60  | ****   |        |        |
| 2-60 vs. 6-20  |        | 0.1520 | ****   |
| 2-60 vs. 6-30  | ****   | ****   | 0.1374 |
| 2-60 vs. 6-40  | ****   | 0.0654 |        |
| 2-60 vs. 6-50  | ****   |        |        |
| 2-60 vs. 6-60  | 0.0007 |        |        |
| 2-60 vs. 8-20  |        | ****   | ****   |
| 2-60 vs. 8-30  |        | ****   |        |
| 2-60 vs. 8-40  | ****   |        |        |
| 2-60 vs. 8-50  | ****   |        |        |
| 2-60 vs. 8-60  | 0.0318 |        |        |
| 2-60 vs. 10-20 |        | 0.0063 | ****   |
| 2-60 vs. 10-30 | ****   | ****   |        |
| 2-60 vs. 10-40 | ****   |        |        |
| 2-60 vs. 10-50 | ****   |        |        |
| 2-60 vs. 10-60 |        |        |        |
| 2-60 vs. 12-20 |        |        |        |
| 2-60 vs. 12-30 |        |        |        |
| 2-60 vs. 12-40 |        |        |        |
| 2-60 vs. 12-50 | 0.0011 |        |        |
| 2-60 vs. 12-60 |        |        |        |

|                |        |        |        |
|----------------|--------|--------|--------|
| 4-20 vs. 4-30  |        |        |        |
| 4-20 vs. 4-40  | ****   | ****   | 0.8462 |
| 4-20 vs. 4-50  | ****   | ****   | 0.7179 |
| 4-20 vs. 4-60  | ****   |        | 0.7179 |
| 4-20 vs. 6-20  |        | 0.0499 | ****   |
| 4-20 vs. 6-30  | ****   | ****   |        |
| 4-20 vs. 6-40  | ****   | 0.0186 |        |
| 4-20 vs. 6-50  | ****   |        |        |
| 4-20 vs. 6-60  | 0.0008 |        |        |
| 4-20 vs. 8-20  |        | ****   | 0.0165 |
| 4-20 vs. 8-30  |        | ****   |        |
| 4-20 vs. 8-40  | ****   |        |        |
| 4-20 vs. 8-50  | ****   |        | 0.8952 |
| 4-20 vs. 8-60  | 0.0344 |        | 0.8462 |
| 4-20 vs. 10-20 |        | 0.0014 | ****   |
| 4-20 vs. 10-30 | ****   | ****   |        |

|                |        |  |        |
|----------------|--------|--|--------|
| 4-20 vs. 10-40 | ****   |  | 0.4870 |
| 4-20 vs. 10-50 | ****   |  | 0.5650 |
| 4-20 vs. 10-60 |        |  | 0.8952 |
| 4-20 vs. 12-20 |        |  |        |
| 4-20 vs. 12-30 |        |  |        |
| 4-20 vs. 12-40 |        |  | 0.8462 |
| 4-20 vs. 12-50 | 0.0013 |  | 0.7179 |
| 4-20 vs. 12-60 |        |  |        |

|                |        |        |        |
|----------------|--------|--------|--------|
| 4-30 vs. 4-40  | ****   | ****   | 0.1054 |
| 4-30 vs. 4-50  | ****   | 0.0377 | 0.0595 |
| 4-30 vs. 4-60  | ****   |        | 0.0595 |
| 4-30 vs. 6-20  |        |        | 0.0002 |
| 4-30 vs. 6-30  | ****   | ****   |        |
| 4-30 vs. 6-40  | ****   |        | 0.1765 |
| 4-30 vs. 6-50  | ****   |        | 0.2239 |
| 4-30 vs. 6-60  | 0.0012 |        | 0.2791 |
| 4-30 vs. 8-20  |        | ****   | 0.4114 |
| 4-30 vs. 8-30  |        | 0.0282 | 0.7179 |
| 4-30 vs. 8-40  | ****   |        | 0.2791 |
| 4-30 vs. 8-50  | ****   |        | 0.1375 |
| 4-30 vs. 8-60  | 0.0496 |        | 0.1054 |
| 4-30 vs. 10-20 |        | 0.4726 | ****   |
| 4-30 vs. 10-30 | ****   | ****   |        |
| 4-30 vs. 10-40 | ****   |        | 0.0231 |
| 4-30 vs. 10-50 | ****   |        | 0.0320 |
| 4-30 vs. 10-60 |        |        | 0.1375 |
| 4-30 vs. 12-20 |        |        |        |
| 4-30 vs. 12-30 |        |        | 0.8461 |
| 4-30 vs. 12-40 |        |        | 0.1054 |
| 4-30 vs. 12-50 | 0.0021 |        | 0.0595 |
| 4-30 vs. 12-60 |        |        | 0.643  |

|                |        |        |        |
|----------------|--------|--------|--------|
| 4-40 vs. 4-50  | 0.7143 | 0.4185 |        |
| 4-40 vs. 4-60  | 0.3278 | ****   |        |
| 4-40 vs. 6-20  | ****   | 0.0007 | ****   |
| 4-40 vs. 6-30  | ****   | ****   | 0.0439 |
| 4-40 vs. 6-40  | 0.0005 | 0.0024 |        |
| 4-40 vs. 6-50  |        | ****   |        |
| 4-40 vs. 6-60  |        | ****   |        |
| 4-40 vs. 8-20  | ****   | 0.7726 | ****   |
| 4-40 vs. 8-30  | 0.0004 | 0.4865 |        |
| 4-40 vs. 8-40  | 0.0248 | ****   |        |
| 4-40 vs. 8-50  | 0.7336 | ****   |        |
| 4-40 vs. 8-60  | 0.2864 | ****   |        |
| 4-40 vs. 10-20 | ****   | 0.0299 | ****   |
| 4-40 vs. 10-30 | 0.0046 | 0.0186 |        |
| 4-40 vs. 10-40 | 0.0052 | ****   |        |
| 4-40 vs. 10-50 | 0.2515 | ****   |        |
| 4-40 vs. 10-60 | ****   | ****   |        |
| 4-40 vs. 12-20 | ****   | ****   |        |
| 4-40 vs. 12-30 | ****   | ****   |        |
| 4-40 vs. 12-40 | ****   | ****   |        |
| 4-40 vs. 12-50 | 0.5496 | ****   |        |

|                |        |        |        |
|----------------|--------|--------|--------|
| 4-40 vs. 12-60 | ****   | ****   |        |
| 4-50 vs. 4-60  |        | 0.0154 |        |
| 4-50 vs. 6-20  | ****   |        | ****   |
| 4-50 vs. 6-30  | 0.2985 | ****   | 0.0231 |
| 4-50 vs. 6-40  | 0.6796 |        |        |
| 4-50 vs. 6-50  |        | ****   |        |
| 4-50 vs. 6-60  | 0.0072 | 0.0003 |        |
| 4-50 vs. 8-20  | ****   | 0.0002 | ****   |
| 4-50 vs. 8-30  | ****   |        |        |
| 4-50 vs. 8-40  |        | 0.0045 |        |
| 4-50 vs. 8-50  |        | 0.0001 |        |
| 4-50 vs. 8-60  | 0.0001 | ****   |        |
| 4-50 vs. 10-20 | ****   |        | ****   |
| 4-50 vs. 10-30 |        | ****   | 0.8461 |
| 4-50 vs. 10-40 |        | 0.0007 |        |
| 4-50 vs. 10-50 |        | 0.0282 |        |
| 4-50 vs. 10-60 | ****   | ****   |        |
| 4-50 vs. 12-20 | ****   | ****   |        |
| 4-50 vs. 12-30 | ****   | 0.0002 |        |
| 4-50 vs. 12-40 | ****   | ****   |        |
| 4-50 vs. 12-50 | 0.0002 | ****   |        |
| 4-50 vs. 12-60 | ****   | ****   |        |
| 4-60 vs. 6-20  | ****   |        | ****   |
| 4-60 vs. 6-30  |        | ****   | 0.0231 |
| 4-60 vs. 6-40  |        | 0.7960 |        |
| 4-60 vs. 6-50  |        |        |        |
| 4-60 vs. 6-60  | 0.0018 |        |        |
| 4-60 vs. 8-20  | ****   | ****   | ****   |
| 4-60 vs. 8-30  | ****   | 0.0113 |        |
| 4-60 vs. 8-40  |        |        |        |
| 4-60 vs. 8-50  |        |        |        |
| 4-60 vs. 8-60  | ****   |        |        |
| 4-60 vs. 10-20 | ****   | 0.2852 | ****   |
| 4-60 vs. 10-30 |        | ****   | 0.8461 |
| 4-60 vs. 10-40 |        |        |        |
| 4-60 vs. 10-50 |        |        |        |
| 4-60 vs. 10-60 | ****   |        |        |
| 4-60 vs. 12-20 | ****   |        |        |
| 4-60 vs. 12-30 | ****   |        |        |
| 4-60 vs. 12-40 | ****   |        |        |
| 4-60 vs. 12-50 | ****   |        |        |
| 4-60 vs. 12-60 | ****   |        |        |
| 6-20 vs. 6-30  | ****   | ****   | 0.0005 |
| 6-20 vs. 6-40  | ****   |        | ****   |
| 6-20 vs. 6-50  | ****   | 0.0527 | ****   |
| 6-20 vs. 6-60  | 0.0007 | 0.2852 | ****   |
| 6-20 vs. 8-20  |        | ****   | 0.7861 |
| 6-20 vs. 8-30  |        |        | ****   |
| 6-20 vs. 8-40  | ****   | 0.7726 | ****   |
| 6-20 vs. 8-50  | ****   | 0.1664 | ****   |
| 6-20 vs. 8-60  | 0.0337 | 0.0620 | ****   |

|                |        |        |      |
|----------------|--------|--------|------|
| 6-20 vs. 10-20 |        |        |      |
| 6-20 vs. 10-30 | ****   | ****   | **** |
| 6-20 vs. 10-40 | ****   | 0.4053 | **** |
| 6-20 vs. 10-50 | ****   |        | **** |
| 6-20 vs. 10-60 |        | 0.0356 | **** |
| 6-20 vs. 12-20 |        | 0.1202 | **** |
| 6-20 vs. 12-30 |        | 0.2157 | **** |
| 6-20 vs. 12-40 |        | 0.0557 | **** |
| 6-20 vs. 12-50 | 0.0012 | 0.0472 | **** |
| 6-20 vs. 12-60 |        | 0.0499 | **** |

|                |        |      |        |
|----------------|--------|------|--------|
| 6-30 vs. 6-40  |        | **** | 0.0795 |
| 6-30 vs. 6-50  | 0.0108 | **** | 0.1054 |
| 6-30 vs. 6-60  | ****   | **** | 0.1374 |
| 6-30 vs. 8-20  | ****   | **** | 0.6426 |
| 6-30 vs. 8-30  | ****   | **** | 0.4869 |
| 6-30 vs. 8-40  |        | **** | 0.1374 |
| 6-30 vs. 8-50  | 0.2823 | **** | 0.0595 |
| 6-30 vs. 8-60  | ****   | **** | 0.0439 |
| 6-30 vs. 10-20 | ****   | **** | 0.0001 |
| 6-30 vs. 10-30 |        | **** |        |
| 6-30 vs. 10-40 |        | **** | 0.0082 |
| 6-30 vs. 10-50 | 0.7705 | **** | 0.0117 |
| 6-30 vs. 10-60 | ****   | **** | 0.0595 |
| 6-30 vs. 12-20 | ****   | **** | 0.8952 |
| 6-30 vs. 12-30 | ****   | **** | 0.6429 |
| 6-30 vs. 12-40 | ****   | **** | 0.0439 |
| 6-30 vs. 12-50 | ****   | **** | 0.0231 |
| 6-30 vs. 12-60 | ****   | **** | 0.4118 |

|                |        |        |      |
|----------------|--------|--------|------|
| 6-40 vs. 6-50  | 0.0578 | 0.0197 |      |
| 6-40 vs. 6-60  | ****   | 0.1386 |      |
| 6-40 vs. 8-20  | ****   | ****   | **** |
| 6-40 vs. 8-30  | ****   |        |      |
| 6-40 vs. 8-40  |        | 0.5427 |      |
| 6-40 vs. 8-50  | 0.6593 | 0.0727 |      |
| 6-40 vs. 8-60  | ****   | 0.0236 |      |
| 6-40 vs. 10-20 | ****   |        | **** |
| 6-40 vs. 10-30 |        | ****   |      |
| 6-40 vs. 10-40 |        | 0.2157 |      |
| 6-40 vs. 10-50 |        | 0.8933 |      |
| 6-40 vs. 10-60 | ****   | 0.0128 |      |
| 6-40 vs. 12-20 | ****   | 0.0499 |      |
| 6-40 vs. 12-30 | ****   | 0.0988 |      |
| 6-40 vs. 12-40 | ****   | 0.0210 |      |
| 6-40 vs. 12-50 | ****   | 0.0175 |      |
| 6-40 vs. 12-60 | ****   | 0.0186 |      |

|               |        |      |      |
|---------------|--------|------|------|
| 6-50 vs. 6-60 | 0.1922 |      |      |
| 6-50 vs. 8-20 | ****   | **** | **** |
| 6-50 vs. 8-30 | ****   | **** |      |
| 6-50 vs. 8-40 | 0.5235 |      |      |
| 6-50 vs. 8-50 |        |      |      |
| 6-50 vs. 8-60 | 0.0079 |      |      |

|                |        |        |      |
|----------------|--------|--------|------|
| 6-50 vs. 10-20 | ****   | 0.0015 | **** |
| 6-50 vs. 10-30 | 0.2078 | ****   |      |
| 6-50 vs. 10-40 | 0.2783 |        |      |
| 6-50 vs. 10-50 |        |        |      |
| 6-50 vs. 10-60 | ****   |        |      |
| 6-50 vs. 12-20 | ****   |        |      |
| 6-50 vs. 12-30 | ****   |        |      |
| 6-50 vs. 12-40 | ****   |        |      |
| 6-50 vs. 12-50 | 0.0200 |        |      |
| 6-50 vs. 12-60 | ****   |        |      |

|                |        |        |      |
|----------------|--------|--------|------|
| 6-60 vs. 8-20  | 0.0021 | ****   | **** |
| 6-60 vs. 8-30  | 0.4308 | 0.0002 |      |
| 6-60 vs. 8-40  | ****   |        |      |
| 6-60 vs. 8-50  | 0.0079 |        |      |
| 6-60 vs. 8-60  |        |        |      |
| 6-60 vs. 10-20 | 0.0010 | 0.0164 | **** |
| 6-60 vs. 10-30 | ****   | ****   |      |
| 6-60 vs. 10-40 | ****   |        |      |
| 6-60 vs. 10-50 | 0.0008 |        |      |
| 6-60 vs. 10-60 | 0.0028 |        |      |
| 6-60 vs. 12-20 | 0.0005 |        |      |
| 6-60 vs. 12-30 | 0.0005 |        |      |
| 6-60 vs. 12-40 | 0.0023 |        |      |
| 6-60 vs. 12-50 |        |        |      |
| 6-60 vs. 12-60 | 0.0010 |        |      |

|                |        |        |        |
|----------------|--------|--------|--------|
| 8-20 vs. 8-30  |        | 0.0002 | 0.0001 |
| 8-20 vs. 8-40  | ****   | ****   | ****   |
| 8-20 vs. 8-50  | ****   | ****   | ****   |
| 8-20 vs. 8-60  | 0.0744 | ****   | ****   |
| 8-20 vs. 10-20 |        | ****   | 0.4864 |
| 8-20 vs. 10-30 | ****   |        | 0.0082 |
| 8-20 vs. 10-40 | ****   | ****   | ****   |
| 8-20 vs. 10-50 | ****   | ****   | ****   |
| 8-20 vs. 10-60 |        | ****   | ****   |
| 8-20 vs. 12-20 |        | ****   | 0.0012 |
| 8-20 vs. 12-30 |        | ****   | 0.0002 |
| 8-20 vs. 12-40 |        | ****   | ****   |
| 8-20 vs. 12-50 | 0.0036 | ****   | ****   |
| 8-20 vs. 12-60 |        | ****   | ****   |

|                |        |        |      |
|----------------|--------|--------|------|
| 8-30 vs. 8-40  | ****   | 0.0032 |      |
| 8-30 vs. 8-50  | ****   | ****   |      |
| 8-30 vs. 8-60  |        | ****   |      |
| 8-30 vs. 10-20 |        |        | **** |
| 8-30 vs. 10-30 | ****   | ****   |      |
| 8-30 vs. 10-40 | ****   | 0.0005 |      |
| 8-30 vs. 10-50 | ****   | 0.0210 |      |
| 8-30 vs. 10-60 |        | ****   |      |
| 8-30 vs. 12-20 |        | ****   |      |
| 8-30 vs. 12-30 |        | 0.0001 |      |
| 8-30 vs. 12-40 |        | ****   |      |
| 8-30 vs. 12-50 | 0.6511 | ****   |      |

|                 |        |        |        |
|-----------------|--------|--------|--------|
| 8-30 vs. 12-60  |        | ****   |        |
| 8-40 vs. 8-50   |        |        |        |
| 8-40 vs. 8-60   | ****   |        |        |
| 8-40 vs. 10-20  | ****   | 0.1261 | ****   |
| 8-40 vs. 10-30  |        | ****   |        |
| 8-40 vs. 10-40  |        |        |        |
| 8-40 vs. 10-50  |        |        |        |
| 8-40 vs. 10-60  | ****   |        |        |
| 8-40 vs. 12-20  | ****   |        |        |
| 8-40 vs. 12-30  | ****   |        |        |
| 8-40 vs. 12-40  | ****   |        |        |
| 8-40 vs. 12-50  | ****   |        |        |
| 8-40 vs. 12-60  | ****   |        |        |
| 8-50 vs. 8-60   | 0.0001 |        |        |
| 8-50 vs. 10-20  | ****   | 0.0072 | ****   |
| 8-50 vs. 10-30  |        | ****   |        |
| 8-50 vs. 10-40  |        |        |        |
| 8-50 vs. 10-50  |        |        |        |
| 8-50 vs. 10-60  | ****   |        |        |
| 8-50 vs. 12-20  | ****   |        |        |
| 8-50 vs. 12-30  | ****   |        |        |
| 8-50 vs. 12-40  | ****   |        |        |
| 8-50 vs. 12-50  | 0.0003 |        |        |
| 8-50 vs. 12-60  | ****   |        |        |
| 8-60 vs. 10-20  | 0.0410 | 0.0018 | ****   |
| 8-60 vs. 10-30  | ****   | ****   |        |
| 8-60 vs. 10-40  | ****   |        |        |
| 8-60 vs. 10-50  | ****   |        |        |
| 8-60 vs. 10-60  |        |        |        |
| 8-60 vs. 12-20  | 0.0260 |        |        |
| 8-60 vs. 12-30  | 0.0250 |        |        |
| 8-60 vs. 12-40  | 0.0666 |        |        |
| 8-60 vs. 12-50  |        |        |        |
| 8-60 vs. 12-60  | 0.0426 |        |        |
| 10-20 vs. 10-30 | ****   | ****   | ****   |
| 10-20 vs. 10-40 | ****   | 0.0299 | ****   |
| 10-20 vs. 10-50 | ****   | 0.4053 | ****   |
| 10-20 vs. 10-60 |        | 0.0009 | ****   |
| 10-20 vs. 12-20 |        | 0.0045 | ****   |
| 10-20 vs. 12-30 |        | 0.0106 | ****   |
| 10-20 vs. 12-40 |        | 0.0016 | ****   |
| 10-20 vs. 12-50 | 0.0016 | 0.0013 | ****   |
| 10-20 vs. 12-60 |        | 0.0014 | ****   |
| 10-30 vs. 10-40 |        | ****   | 0.6430 |
| 10-30 vs. 10-50 |        | ****   | 0.7179 |
| 10-30 vs. 10-60 | ****   | ****   |        |
| 10-30 vs. 12-20 | ****   | ****   |        |
| 10-30 vs. 12-30 | ****   | ****   |        |
| 10-30 vs. 12-40 | ****   | ****   |        |

|                 |        |      |        |
|-----------------|--------|------|--------|
| 10-30 vs. 12-50 | ****   | **** | 0.8461 |
| 10-30 vs. 12-60 | ****   | **** |        |
| 10-40 vs. 10-50 |        |      |        |
| 10-40 vs. 10-60 | ****   |      |        |
| 10-40 vs. 12-20 | ****   |      |        |
| 10-40 vs. 12-30 | ****   |      |        |
| 10-40 vs. 12-40 | ****   |      |        |
| 10-40 vs. 12-50 | ****   |      |        |
| 10-40 vs. 12-60 | ****   |      |        |
| 10-50 vs. 10-60 | ****   |      |        |
| 10-50 vs. 12-20 | ****   |      |        |
| 10-50 vs. 12-30 | ****   |      |        |
| 10-50 vs. 12-40 | ****   |      |        |
| 10-50 vs. 12-50 | ****   |      |        |
| 10-50 vs. 12-60 | ****   |      |        |
| 10-60 vs. 12-20 |        |      |        |
| 10-60 vs. 12-30 |        |      |        |
| 10-60 vs. 12-40 |        |      |        |
| 10-60 vs. 12-50 | 0.0050 |      |        |
| 10-60 vs. 12-60 |        |      |        |
| 12-20 vs. 12-30 |        |      |        |
| 12-20 vs. 12-40 |        |      |        |
| 12-20 vs. 12-50 | 0.0009 |      |        |
| 12-20 vs. 12-60 |        |      |        |
| 12-30 vs. 12-40 |        |      |        |
| 12-30 vs. 12-50 | 0.0008 |      |        |
| 12-30 vs. 12-60 |        |      |        |
| 12-40 vs. 12-50 | 0.0043 |      |        |
| 12-40 vs. 12-60 |        |      |        |
| 12-50 vs. 12-60 | 0.0017 |      |        |
